# Supplementary material
Source: publisher figshare collection journal article supplement (https://gsapubs.figshare.com/ndownloader/files/23299757)
Supplement: Supplementary file 1 [file 23299757]

# Antarctic microbial mats: A modern analogue for Archean lacustrine oxygen oases Data Repository

**Dawn Y. Sumner<sup>1</sup>, Ian Hawes<sup>2</sup>, Tyler J. Mackey<sup>1</sup>, Anne D. Jungblut<sup>3</sup> and Peter T. Doran<sup>4</sup>**

<sup>1</sup>*Department of Earth and Planetary Sciences, University of California–Davis, 1 Shields Avenue, Davis, California 95616, USA*

<sup>2</sup>*Gateway Antarctica, University of Canterbury, Christchurch, New Zealand*

<sup>3</sup>*Department of Life Sciences, The Natural History Museum, Cromwell Road, London SW7 5BD, UK*

<sup>4</sup>*Department of Geology and Geophysics, Louisiana State University, Baton Rouge, Louisiana 70803, USA*

Table DR1. Microscopic characterization of cyanobacteria morphotypes on genus level in mats at 9.0 m and 9.8 m in Lake Fryxell, Antarctica, obtained directly after sample collection in the field. Several samples were examined from each mat, and morphotypes were scored for abundance on a scale of rare (+, present in some fields of view), frequent (++, present in all fields of view) and common (+++, many trichomes in all fields of view).

| Cyanobacteria morphotypes | Description                                                                                                                     | Mat at 9.0 m | Mat at 9.8 m |
|---------------------------|---------------------------------------------------------------------------------------------------------------------------------|--------------|--------------|
| <i>Leptolyngbya</i> sp. 1 | Cells width 0.5-1 $\mu\text{m}$ width, pointy end cell, longer than wide, purple colouration                                    | +++          | +            |
| <i>Leptolyngbya</i> sp. 2 | Cells width 1-2 $\mu\text{m}$ width, rounded end cell, longer than wide, constriction at cross-wall, purple colouration         | ++           | +            |
| <i>Pseudanabaena</i> sp.  | Cell width $\sim 2 \mu\text{m}$ , no sheath, cells constricted at cross-wall                                                    | +            | +            |
| <i>Phormidium</i> sp. 1   | Cell width 6-7 $\mu\text{m}$ , bright green colouration, cells as wide as long, cell not constricted at cross-wall, very motile | +            | +++          |
| <i>Phormidium</i> sp. 2   | Cell width 6-7 $\mu\text{m}$ , purple colouration, cells as wide as long, cell not constricted at cross-wall, some motility     | +            | +            |
| <i>Oscillatoria</i> sp.   | Cell width $\sim 8 \mu\text{m}$ , olive-green colouration, cells shorter than wide, constricted at cross-wall, motile           | +            | +            |

Figure DR1. Motile, green *Phormidium* that dominates the mat at 9.8 m. Phase contrast image at x400 magnification. The scale bar is 10  $\mu\text{m}$ .

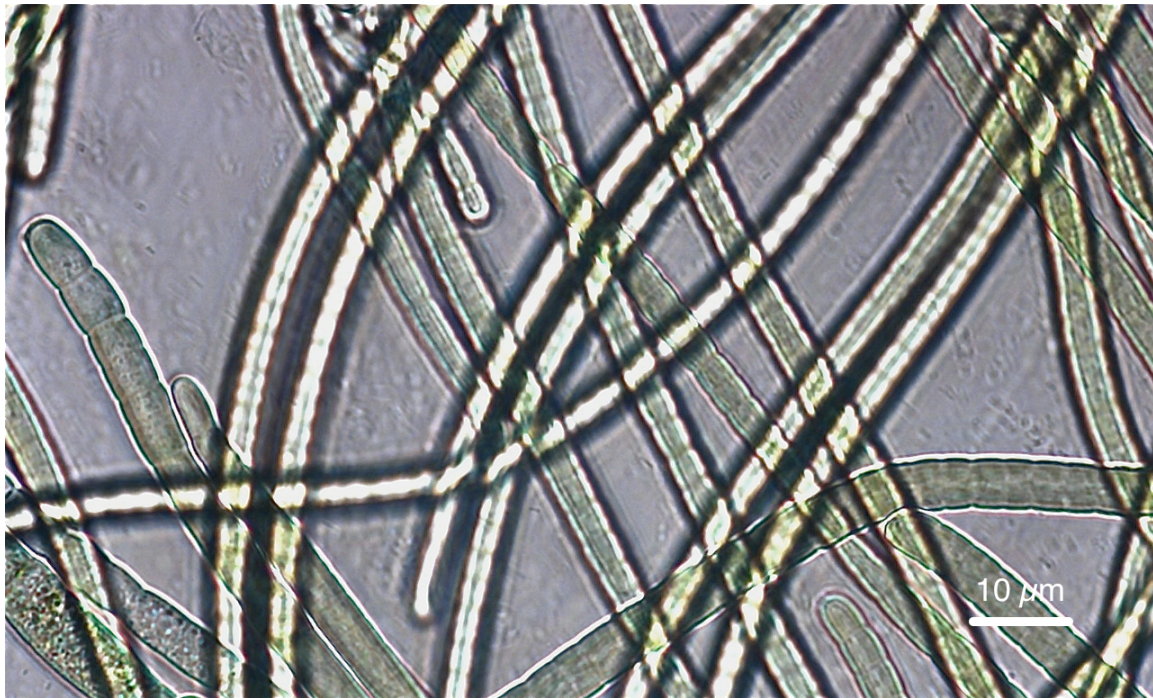

Table DR2. Microelectrode profiles of dissolved oxygen concentration in microbial mats at 9.0 m depth in Lake Fryxell. Zero depth indicates the mat-water interface, negative numbers are above the interface in the water column and positive numbers below in the mat.

| Depth into mat<br>(mm) | Profile 1<br>$\mu\text{mol O}_2 \text{ L}^{-1}$ | Profile 2<br>$\mu\text{mol O}_2 \text{ L}^{-1}$ |
|------------------------|-------------------------------------------------|-------------------------------------------------|
| -5                     | 646.5712                                        | 623.4847                                        |
| -4                     | 642.6301                                        | 624.1609                                        |
| -3                     | 651.8647                                        | 614.9263                                        |
| -2                     | 653.7773                                        | 626.0735                                        |
| -1                     | 664.2482                                        | 631.9271                                        |
| 0                      | 748.6921                                        | 674.8153                                        |
| 1                      | 838.6417                                        | 797.0859                                        |
| 2                      | 837.1733                                        | 827.9387                                        |
| 3                      | 838.6417                                        | 797.0859                                        |
| 4                      | 830.8755                                        | 775.4678                                        |
| 5                      | 818.4919                                        | 758.4670                                        |
| 6                      | 798.2262                                        | 742.8186                                        |
| 7                      | 784.4903                                        | 733.7000                                        |
| 8                      | 755.6662                                        | 723.3450                                        |
| 9                      | 736.0766                                        | 703.7555                                        |
| 10                     | 719.7520                                        | 687.4309                                        |
| 11                     | 694.8689                                        | 676.3997                                        |
| 12                     | 673.9270                                        | 664.6924                                        |
| 13                     | 668.7495                                        | 650.2803                                        |
| 14                     | 649.7201                                        | 649.7201                                        |
| 15                     | 648.4838                                        | 634.6319                                        |
| 16                     | 647.2474                                        | 619.5436                                        |
| 17                     | 641.3938                                        | 609.0727                                        |

Table DR3. Microelectrode profiles of dissolved oxygen concentration in microbial mats at 9.8 m depth in Lake Fryxell. Zero depth indicates the mat-water interface, negative numbers are above the interface in the water column and positive numbers below in the mat.

| Depth into mat (mm) | Profile 1<br>$\mu\text{mol O}_2 \text{ L}^{-1}$ | Profile 2<br>$\mu\text{mol O}_2 \text{ L}^{-1}$ | Profile 3<br>$\mu\text{mol O}_2 \text{ L}^{-1}$ | Profile 4<br>$\mu\text{mol O}_2 \text{ L}^{-1}$ | Profile 5<br>$\mu\text{mol O}_2 \text{ L}^{-1}$ |
|---------------------|-------------------------------------------------|-------------------------------------------------|-------------------------------------------------|-------------------------------------------------|-------------------------------------------------|
| -7                  | 3.3                                             | 0.0                                             | 0.0                                             | 0.0                                             | 0.0                                             |
| -6                  | 4.6                                             | 0.0                                             | 0.0                                             | 0.0                                             | 0.0                                             |
| -5                  | 4.6                                             | 0.0                                             | 0.0                                             | 0.0                                             | 0.0                                             |
| -4                  | 7.5                                             | 0.0                                             | 0.0                                             | 8.8                                             | 2.9                                             |
| -3                  | 4.9                                             | 1.6                                             | 0.0                                             | 16.7                                            | 6.1                                             |
| -2                  | 8.8                                             | 3.3                                             | 7.5                                             | 15.7                                            | 8.8                                             |
| -1                  | 13.7                                            | 6.5                                             | 36.2                                            | 20.6                                            | 21.1                                            |
| 0                   | 56.2                                            | 54.9                                            | 46.7                                            | 49.0                                            | 50.2                                            |
| 1                   | 55.8                                            | 55.8                                            | 52.2                                            | 48.3                                            | 52.1                                            |
| 2                   | 39.5                                            | 47.0                                            | 35.9                                            | 34.0                                            | 40.8                                            |
| 3                   | 15.7                                            | 29.1                                            | 20.6                                            | 15.7                                            | 21.8                                            |
| 4                   | 0.3                                             | 4.6                                             | 4.9                                             | 2.9                                             | 3.3                                             |
| 5                   | 0.3                                             | 0.0                                             | 0.0                                             | 0.0                                             | 0.1                                             |
| 6                   | 0.0                                             | 0.0                                             | 0.0                                             | 0.0                                             | 0.0                                             |
| 7                   | 3.3                                             | 0.0                                             | 0.0                                             | 0.0                                             | 0.0                                             |

Note: At 9.8 m depth, the chemical boundary layer between the anoxic water column and the oxic mat varied in thickness from 1 to 5 mm in the five profiles measured. Because the water column was density stratified and lacked mixing under normal circumstances, such variability in the thickness of a boundary layer was not expected. This variation may reflect mixing due to turbulence from the diver who was measuring the profile using a manual micromanipulator. Any mixing due to turbulence would have reduced the total  $\text{O}_2$  above the mat because the water column was anoxic. Thus, the substantial  $\text{O}_2$  peak within the mat reliably demonstrates that the mat was a net source of  $\text{O}_2$  to the environment.
